# Supplementary material for: Reusable and universal impedimetric sensing platform for the rapid and sensitive detection of pathogenic bacteria based on bacteria-imprinted polythiophene film
Source: Royal Society of Chemistry journal article supplement (doi:10.1039/d2an01122k), 2022-01-01
Supplement: d2an01122k1.pdf [file d2an01122k1.pdf]

## Supporting information

# Reusable and Universal Impedimetric Sensing Platform for Rapid and Sensitive Detection of Pathogenic Bacteria Based on Bacteria-Imprinted Polythiophene Film

Lingling Wang,<sup>†,1</sup> Xiaohui Lin,<sup>†,1</sup> Ting Liu,<sup>†</sup> Zhaohuan Zhang,<sup>†</sup> Jie Kong,<sup>†</sup> Hai Yu,<sup>†</sup> Juan Yan,<sup>†</sup> Donglei Luan,<sup>†</sup> Yong Zhao<sup>\*,†</sup>, Xiaojun Bian<sup>\*,†,‡,§</sup>

<sup>†</sup> College of Food Science and Technology, Shanghai Ocean University, Shanghai 201306, China

<sup>‡</sup> Laboratory of Quality and Safety Risk Assessment for Aquatic Product on Storage and Preservation (Shanghai), Ministry of Agriculture, Shanghai 201306, China

<sup>§</sup> Shanghai Engineering Research Center of Aquatic-Product Processing & Preservation, Shanghai 201306, China

\*Corresponding author: Email address: [yzhao@shou.edu.cn](mailto:yzhao@shou.edu.cn); [xjbian@shou.edu.cn](mailto:xjbian@shou.edu.cn)

Fax: +86-21-61900753

### Summary:

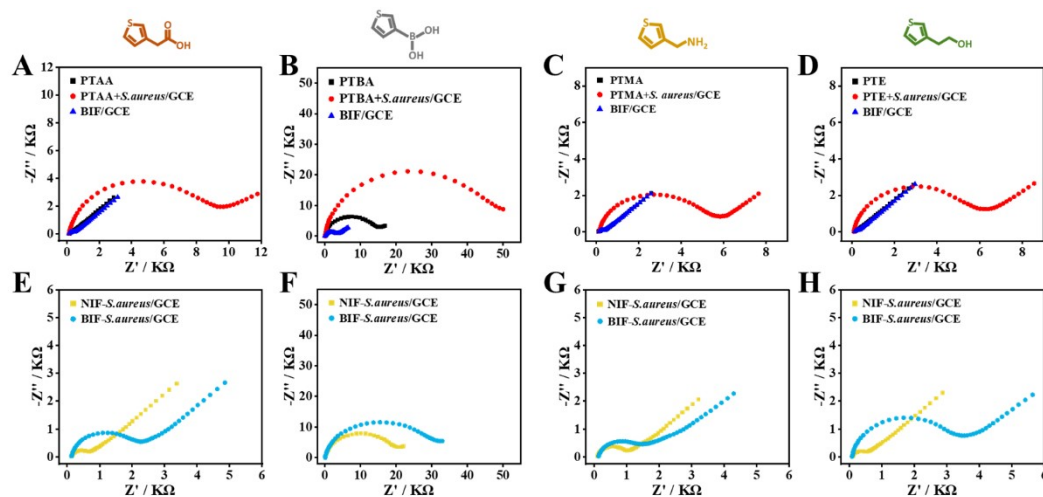

**Figure S1.** (A-D) Electrochemical impedance spectroscopy (EIS) for each electropolymerized 3-substituted thiophene in the presence and absence of *S. aureus* template, and the corresponding bacteria-imprinted polythiophene film (BIF) after template removal. (E-H) EIS response of each BIF and non-imprinted polythiophene film (NIF) towards target *S. aureus*.

[在此处键入]

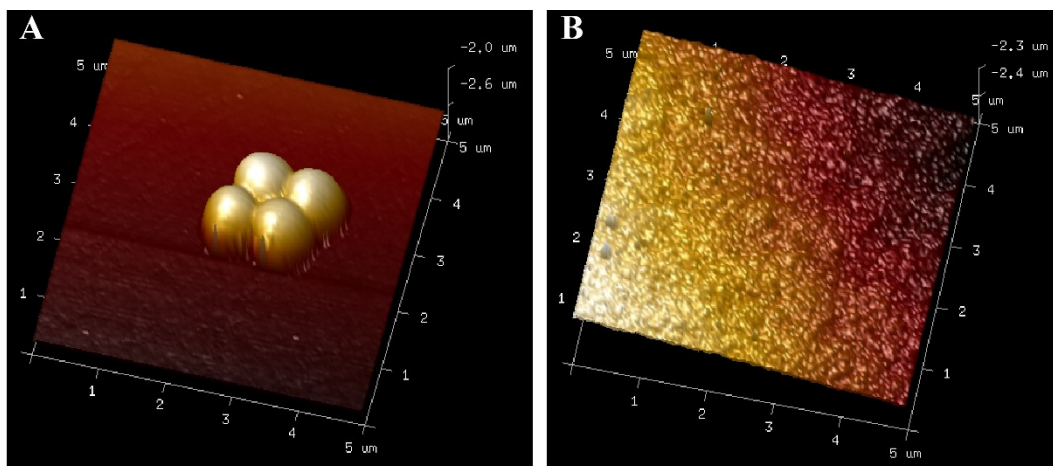

**Figure S2.** AFM images of (A) PTE+*S. aureus*/GCE and (B) BIF/GCE

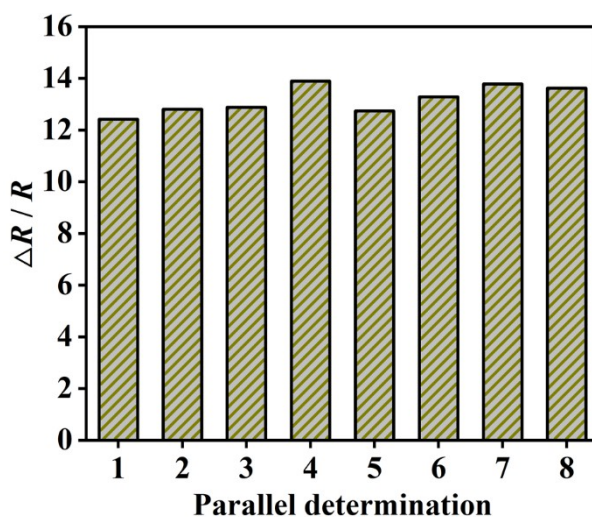

**Figure S3.** EIS response of eight BIF/GCE electrodes towards *S. aureus* ( $10^5$  CFU/mL)

**Table S1.** Comparison of the proposed sensor with other reported label-free electrochemical sensors for the direct detection of *S. aureus* cells.

| Sensor                                             | Method | Sensor fabrication | Analysis time (min) | LOD (CFU mL <sup>-1</sup> ) | Reference |
|----------------------------------------------------|--------|--------------------|---------------------|-----------------------------|-----------|
| BC/c-MWCNTs-PEI-phage                              | DPV    | >7 days            | 30                  | 3                           | 1         |
| Ab-HMS-GCE                                         | EIS    | >3 days            | 20                  | 12                          | 2         |
| Apt-Ag-Cs-Gr QDs/NTiO <sub>2</sub> /SPCE           | DPV    | >24 h              | 90                  | 3.3                         | 3         |
| Ab/GNRs/GCE                                        | EIS    | >12 h              | 50                  | $2.4 \times 10^2$           | 4         |
| MIP-Apt-AuNPs@ Fe <sub>3</sub> O <sub>4</sub> /GCE | DPV    | >12 h              | 45                  | 1                           | 5         |

[在此处键入]

|                              |     |        |    |     |           |
|------------------------------|-----|--------|----|-----|-----------|
| <i>Apt/AuNPs/Cu-MOFs/GCE</i> | DPV | >1.5 h | 30 | 5.2 | 6         |
| BICP/gold electrode          | EIS | >2 h   | 10 | 2   | 7         |
| BIF/GCE                      | EIS | 15 min | 10 | 4   | This work |

BC: bacterial cellulose; c-MWCNTs: carboxylated multiwalled carbon nanotubes; PEI: polyethyleneimine; Ab: antibody; HMS: hierarchical mesoporous silica; GCE: glassy carbon electrode; Apt: aptamer; Cs: chitosan; Gr QDs: graphene quantum dots; NTiO<sub>2</sub>: nitrogen-doped TiO<sub>2</sub> nanoparticles; SPCE: a screen-printed carbon electrode; GNR: gold nanorods; MIP: molecular imprinted polymer; *AuNPs*: gold nanoparticles; BICP: bacteria-imprinted conductive poly(3-thiopheneacetic acid); MOFs: metal-organic frameworks.

## References

1. U. Farooq, M. W. Ullah, Q. Yang, A. Aziz, J. Xu, L. Zhou and S. Wang, *Biosens. Bioelectron.*, 2020, **157**, 112163.
2. H. Wang, Y. Xiu, Y. Chen, L. Sun, L. Yang, H. Chen and X. Niu, *RSC Adv*, 2019, **9**, 16278-16287.
3. M. Ghalkhani, E. Sohoul, S. S. Khaloo and M. H. Vaziri, *Chemosphere*, 2022, **293**, 133597.
4. E. Han, X. Li, Y. Zhang, M. Zhang, J. Cai and X. Zhang, *Anal Biochem*, 2020, **611**, 113982.
5. M. M. El-Wakil, H. M. Halby, M. Darweesh, M. E. Ali and R. Ali, *Scientific Reports*, 2022, **12**, 12502.
6. Z. Sun, Y. Peng, M. Wang, Y. Lin, M. Jalalah, S. A. Alsareii, F. A. Harraz, J. Yang and G. Li, *Anal. Chem.*, 2021, **93**, 8994-9001.
7. R. Wang, L. Wang, J. Yan, D. Luan, S. Tao, J. Wu and X. Bian, *Talanta*, 2021, **226**, 122135.
